# Supplementary material for: UGT74D1 Catalyzes the Glucosylation of 2-Oxindole-3-Acetic Acid in the Auxin Metabolic Pathway in Arabidopsis
Source: PubMed Central journal article supplement — Plant Cell Physiol. 2013 Nov 26;55(1):218–28. doi: 10.1093/pcp/pct173 (PMC3894777; doi:10.1093/pcp/pct173), 2013-11-26
Supplement: supp_pct173_pcp-2013-e-00512-File007.pdf [file supp_pct173_pcp-2013-e-00512-File007.pdf]

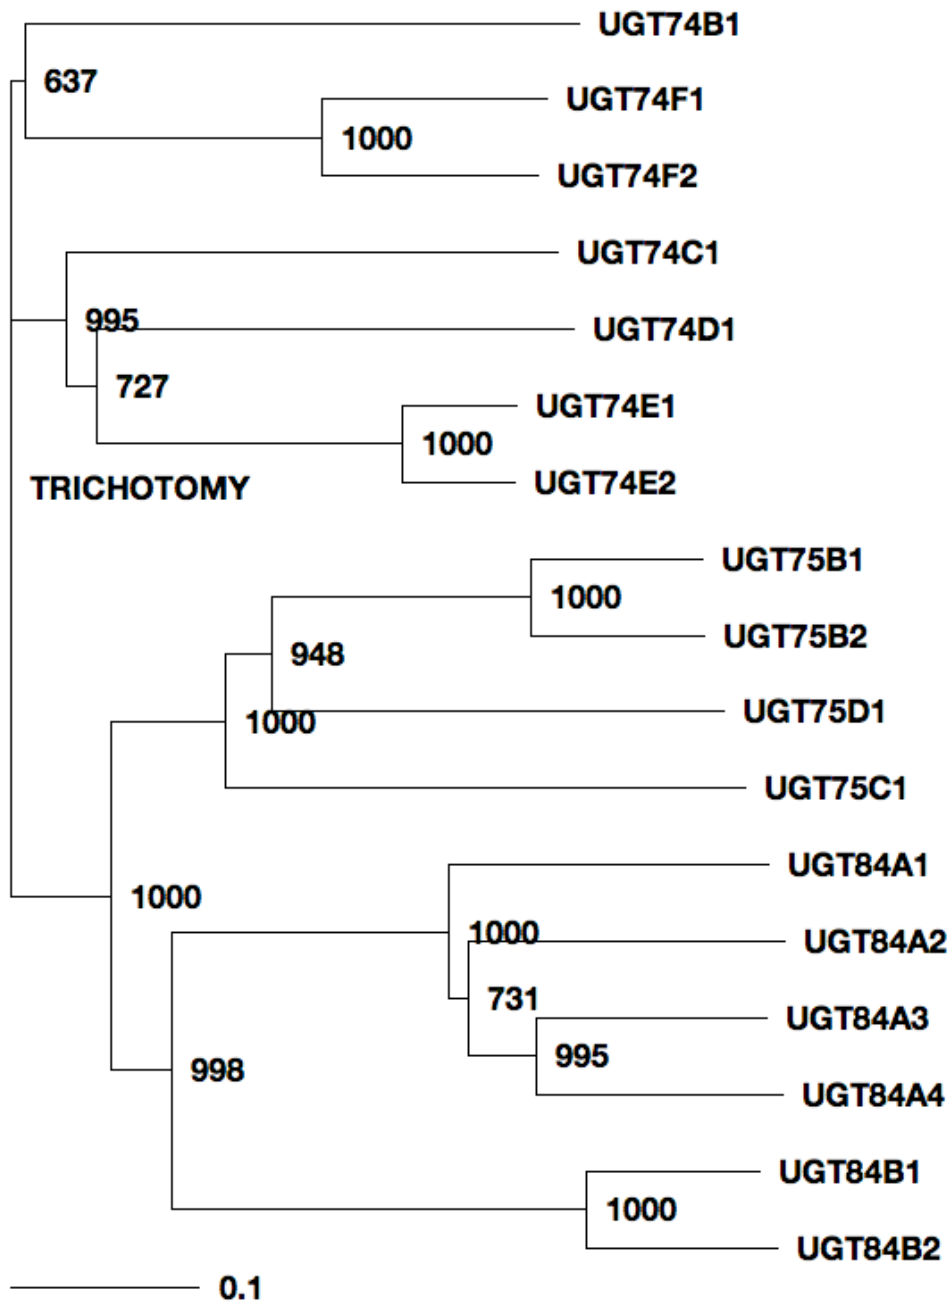

**Supplementary Fig. S1. Phylogenetic relationship between Group L UGTs in *Arabidopsis*.**

The phylogenetic tree of *Arabidopsis* UGTs in Group L was adopted from a previous study (Li et al. 2001). The phylogenetic tree was generated using TreeView X. The numbers at the branch points give the bootstrap values. The scale bar indicates sequence divergence.
