# Supplementary material for: UGT74D1 Catalyzes the Glucosylation of 2-Oxindole-3-Acetic Acid in the Auxin Metabolic Pathway in Arabidopsis
Source: PubMed Central journal article supplement — Plant Cell Physiol. 2013 Nov 26;55(1):218–28. doi: 10.1093/pcp/pct173 (PMC3894777; doi:10.1093/pcp/pct173), 2013-11-26
Supplement: supp_pct173_pcp-2013-e-00512-File008.pdf [file supp_pct173_pcp-2013-e-00512-File008.pdf]

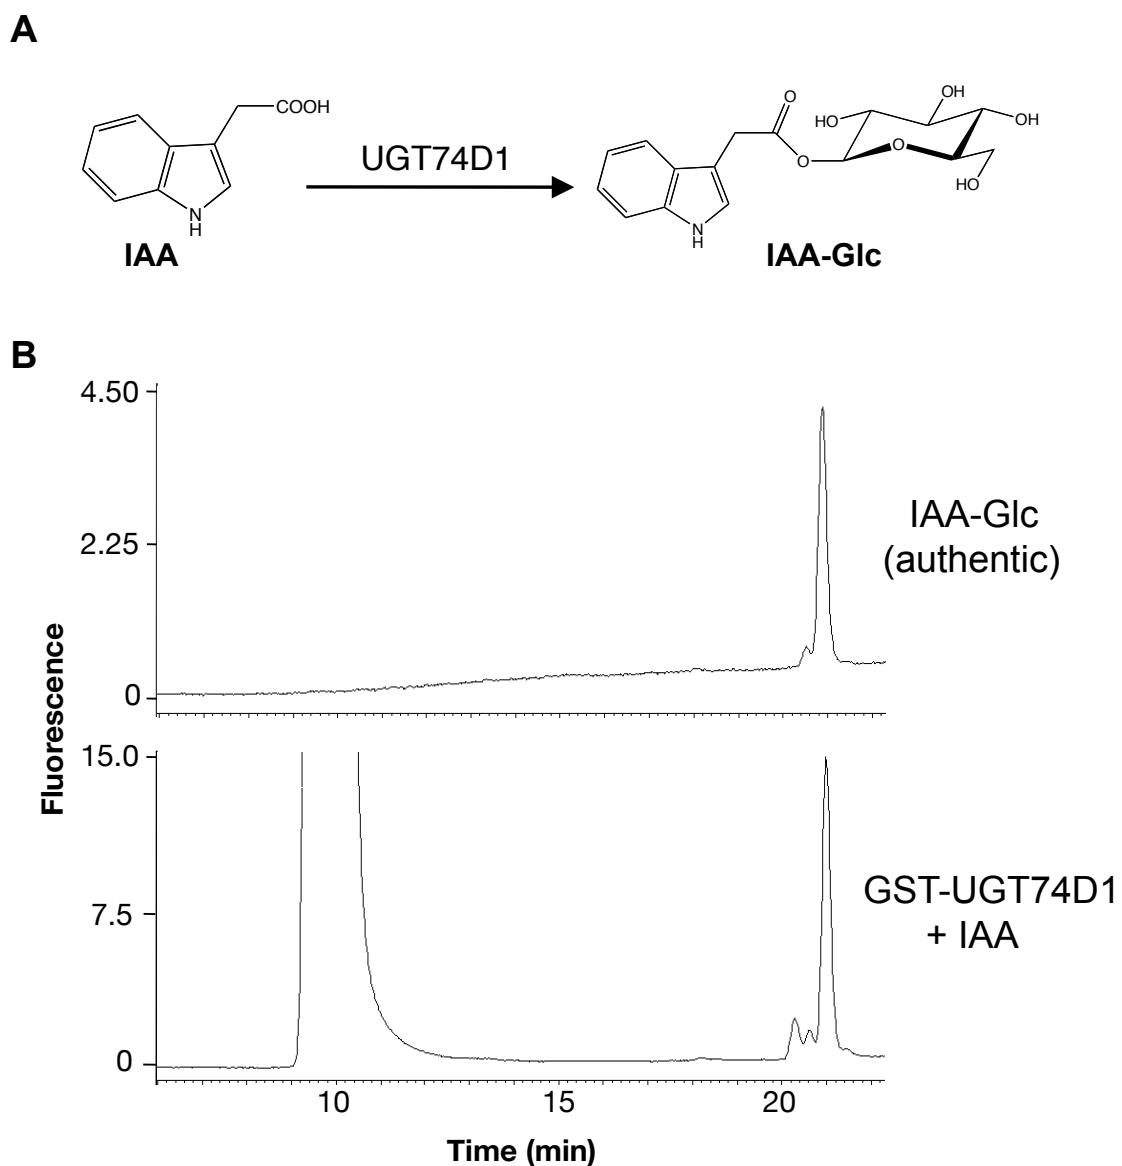

**Supplementary Fig. S2. Conversion of IAA to IAA-Glc by GST-UGT74D1.**

(A) Enzymatic reaction catalyzed by UGT74D1. (B) The HPLC chromatogram for authentic IAA-Glc (21.0 min) and reaction products of GST-UGT74D1 with IAA (GST-UGT74D1 + IAA) in the presence of UDP-glucose. The fluorescent emission at 355 nm was detected using 2475 multi  $\lambda$ -fluorescence detector with excitation at 280 nm.
