# Supplementary material for: UGT74D1 Catalyzes the Glucosylation of 2-Oxindole-3-Acetic Acid in the Auxin Metabolic Pathway in Arabidopsis
Source: PubMed Central journal article supplement — Plant Cell Physiol. 2013 Nov 26;55(1):218–28. doi: 10.1093/pcp/pct173 (PMC3894777; doi:10.1093/pcp/pct173), 2013-11-26
Supplement: supp_pct173_pcp-2013-e-00512-File009.pdf [file supp_pct173_pcp-2013-e-00512-File009.pdf]

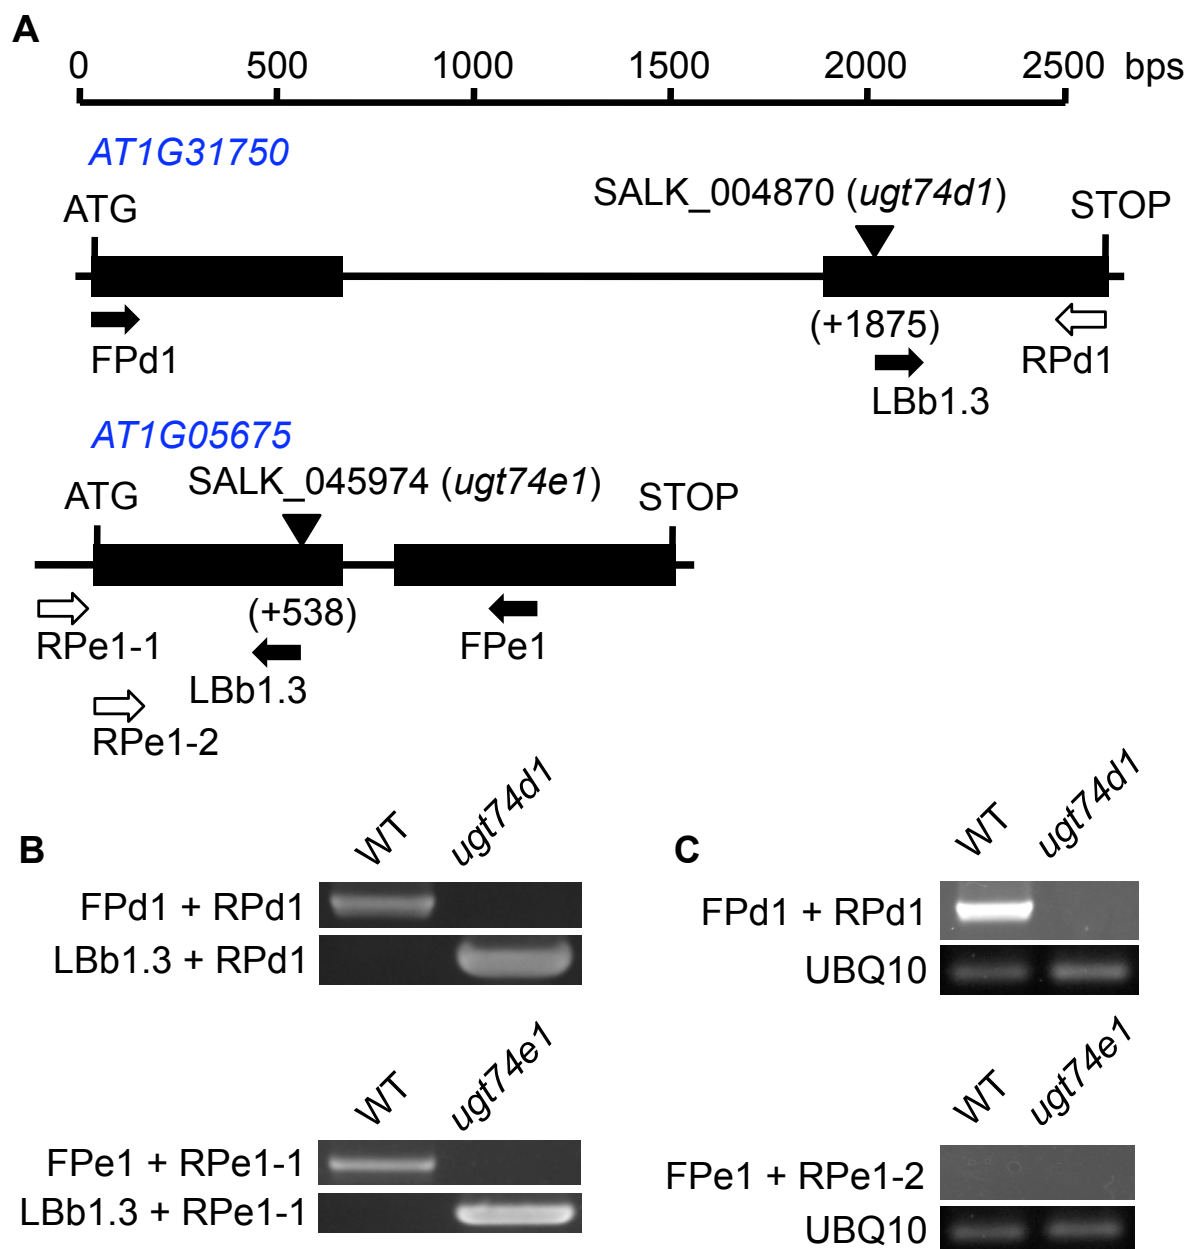

**Supplementary Fig. S3. Identification of homozygous T-DNA insertion *ugt74d1* (SALK\_004870) and *ugt74e1* (SALK\_045974) mutants.**

(A) Schematic diagram of the *UGT74D1* and *UGT74E1* genes of *Arabidopsis* and the T-DNA insertion sites. Exons are represented by black boxes and introns by lines. The position of the T-DNA insertion is indicated in a bracket with respect to the ATG translation start codon (+1). Black and white arrows show the positions and orientations of the primers used for genotyping and RT-PCR analysis. (B) Validation of the mutant lines by PCR analysis of *UGT74D1* and *UGT74E1* genes. (C) Validation of the mutant lines by RT-PCR analysis of *UGT74D1* and *UGT74E1* transcripts. The expression of *UGT74E1* in WT was below detection limit of our RT-PCR. Primers are listed in [Supplementary Table S2](#). FPd1 and RPd1: forward and reverse primers for *UGT74D1*; FPe1 and RPe1: forward and reverse primers for *UGT74E1*; LBb1.3: T-DNA left border primer; UBQ10: ubiquitin.
