# Supplementary material for: UGT74D1 Catalyzes the Glucosylation of 2-Oxindole-3-Acetic Acid in the Auxin Metabolic Pathway in Arabidopsis
Source: PubMed Central journal article supplement — Plant Cell Physiol. 2013 Nov 26;55(1):218–28. doi: 10.1093/pcp/pct173 (PMC3894777; doi:10.1093/pcp/pct173), 2013-11-26
Supplement: supp_pct173_pcp-2013-e-00512-File010.pdf [file supp_pct173_pcp-2013-e-00512-File010.pdf]

**Supplementary Table S1** List of RIKEN Arabidopsis full-length (RAFL) clones used in this study.

| Gene           | AGI code  | Resource number | cDNA clone name | Primers for vector construction |
|----------------|-----------|-----------------|-----------------|---------------------------------|
| <i>UGT74B1</i> | AT1G24100 | pda00614        | RAFL04-19-M06   | RAFL04-06_F & RAFL04-06_R       |
| <i>UGT74F1</i> | AT2G43840 | pda15474        | RAFL07-84-M10   | RAFL07-11_F & RAFL07-11_R       |
| <i>UGT74F2</i> | AT2G43820 | pda04176        | RAFL07-12-I23   | RAFL07-11_F & RAFL07-11_R       |
| <i>UGT74C1</i> | AT2G31790 | pda04758        | RAFL08-13-B20   | RAFL07-11_F & RAFL07-11_R       |
| <i>UGT74D1</i> | AT2G31750 | pda09424        | RAFL06-15-P19   | RAFL04-06_F & RAFL04-06_R       |
| <i>UGT74E1</i> | AT1G05675 | -               | -               | -                               |
| <i>UGT74E2</i> | AT1G05680 | -               | -               | -                               |
| <i>UGT75B1</i> | AT1G05560 | pda01666        | RAFL09-11-P10   | RAFL07-11_F & RAFL07-11_R       |
| <i>UGT75B2</i> | AT1G05530 | -               | -               | -                               |
| <i>UGT75D1</i> | AT4G15550 | pda05237        | RAFL09-09-C15   | RAFL07-11_F & RAFL07-11_R       |
| <i>UGT75C1</i> | AT4G14090 | pda04986        | RAFL08-18-I03   | RAFL07-11_F & RAFL07-11_R       |
| <i>UGT84A1</i> | AT4G15480 | pda12406        | RAFL11-02-N24   | RAFL07-11_F & RAFL07-11_R       |
| <i>UGT84A2</i> | AT3G21560 | pda08060        | RAFL09-24-B02   | RAFL07-11_F & RAFL07-11_R       |
| <i>UGT84A3</i> | AT4G15490 | pda07420        | RAFL05-18-O17   | RAFL04-06_F & RAFL04-06_R       |
| <i>UGT84A4</i> | AT4G15500 | pda20336        | RAFL21-84-C22   | RAFL12-25_F & RAFL12-25_R       |
| <i>UGT84B1</i> | AT2G23260 | pda11460        | RAFL19-68-D14   | RAFL12-25_F & RAFL12-25_R       |
| <i>UGT84B2</i> | AT2G23250 | -               | -               | -                               |
