# Supplementary material for: UGT74D1 Catalyzes the Glucosylation of 2-Oxindole-3-Acetic Acid in the Auxin Metabolic Pathway in Arabidopsis
Source: PubMed Central journal article supplement — Plant Cell Physiol. 2013 Nov 26;55(1):218–28. doi: 10.1093/pcp/pct173 (PMC3894777; doi:10.1093/pcp/pct173), 2013-11-26
Supplement: supp_pct173_pcp-2013-e-00512-File011.pdf [file supp_pct173_pcp-2013-e-00512-File011.pdf]

**Supplementary Table S2** Primers used for vector construction and expression analysis.

| Primer name                   | Sequence (5' to 3')                                            |
|-------------------------------|----------------------------------------------------------------|
| <b>Vector construction</b>    |                                                                |
| RAFL04-06_F                   | GGGG <u>ACAAGTTTGTACAAAAAAGCAGGCT</u> GGCCAAATCGGCCCTCGAGTTAA  |
| RAFL04-06_R                   | GGGG <u>ACCACTTTGTACAAGAAAGCTGGGT</u> GGCCCTTATGGCCGAGCTCTTTT  |
| RAFL07-11_F                   | GGGG <u>ACAAGTTTGTACAAAAAAGCAGGCT</u> GGCCAAATCGGCCGAGCTCGAATT |
| RAFL07-11_R                   | GGGG <u>ACCACTTTGTACAAGAAAGCTGGGT</u> AGGCCCTTATGGCCGGATCCAAGA |
| RAFL12-25_F                   | GGGG <u>ACAAGTTTGTACAAAAAAGCAGGCT</u> GGCCAAATCGGCCGAGCTCGAATT |
| RAFL12-25_R                   | GGGG <u>ACCACTTTGTACAAGAAAGCTGGGT</u> AGGCCCTTATGGCCGGATCCAA   |
| UGT74D1_F                     | GGGG <u>ACAAGTTTGTACAAAAAAGCAGGCTTC</u> ATGGGAGAGAAAGCGAAAGCAA |
| UGT74D1_R                     | GGGG <u>ACCACTTTGTACAAGAAAGCTGGGTCCCTCACAATTTTAGCAACAAACTC</u> |
| <b>RT-PCR</b>                 |                                                                |
| UGT74D1_RT-PCR_F              | CCGTGAACGCGACCTATATT                                           |
| UGT74D1_RT-PCR_R              | GACACGTAGATCACTGAACC                                           |
| GH3.2_F                       | GAAATGACTCGGAACCCTGA                                           |
| GH3.2_R                       | ACCCACCTGACGTCTTTGAC                                           |
| GH3.3_F                       | GATGATGCACTCACCGTCCA                                           |
| GH3.3_R                       | TGGTAATCCACCGGGAGTCT                                           |
| GH3.5_F                       | GGAGTATCTCAGGCGACACG                                           |
| GH3.5_R                       | AGGATGGTCTCGTTAGGGCT                                           |
| UBQ10_F                       | GGACCAGCAGCGTCTCATCTTCGCT                                      |
| UBQ10_R                       | CTTATTCATCAGGGATTATACAAG                                       |
| <b>Validation of mutation</b> |                                                                |
| FPd1                          | ATGGGAGAGAAAGCGAAAGCAA                                         |
| RPd1                          | CCTCACAATTTTAGCAACAAACTC                                       |
| FPe1                          | CTTCAAGTTGTGGACTCCAGC                                          |
| RPe1-1                        | CCCAACCTTATAAATACACACAC                                        |
| RPe1-2                        | ATGAGAGAAGGATCTCATGTTATTGTT                                    |
| LBb1.3                        | ATTTTGCCGATTTTCGGAAC                                           |

Underline represents attB site.
