# Supplementary material for: UGT74D1 Catalyzes the Glucosylation of 2-Oxindole-3-Acetic Acid in the Auxin Metabolic Pathway in Arabidopsis
Source: PubMed Central journal article supplement — Plant Cell Physiol. 2013 Nov 26;55(1):218–28. doi: 10.1093/pcp/pct173 (PMC3894777; doi:10.1093/pcp/pct173), 2013-11-26
Supplement: supp_pct173_pcp-2013-e-00512-File012.pdf [file supp_pct173_pcp-2013-e-00512-File012.pdf]

## Supplementary Methods

### Synthesis of [phenyl-<sup>13</sup>C<sub>6</sub>]OxIAA

[phenyl-<sup>13</sup>C<sub>6</sub>]2-oxindol-3-yl acetic acid ([phenyl-<sup>13</sup>C<sub>6</sub>]OxIAA) was prepared from [phenyl-<sup>13</sup>C<sub>6</sub>]indole-3-acetic acid (<sup>13</sup>C<sub>6</sub>-IAA) according to the method of Tuominen et. al. with slight modifications (Schmidt and Michel 1985; Tuominen et al. 1994). <sup>13</sup>C<sub>6</sub>-IAA (20 mg, 0.11 mmol) was stirred in *t*-BuOH (0.6 mL) containing H<sub>2</sub>O (0.01 mL) and then *N*-bromosuccinimide (15.7 mg IAA, 0.088 mmol) was gradually added over 15 min at room temperature. The mixture was stirred for 1 h at room temperature. The resulting solution was added into water (15 mL) and adjusted to pH 3.0. The mixture was extracted with EtOAc (15 mL x 3). The organic layer was dried over Na<sub>2</sub>SO<sub>4</sub>, the solvent was removed *in vacuo*. The residue was purified by a silica gel column chromatography with CHCl<sub>3</sub>–MeOH (4:1) to give [phenyl-<sup>13</sup>C<sub>6</sub>]OxIAA (14.1 mg, 65% yield) as a yellow powder LC-ESI-MS *m/z* 198.09 [M+H]<sup>+</sup>: C<sub>4</sub><sup>13</sup>C<sub>6</sub>H<sub>10</sub>NO<sub>3</sub> The NMR spectrum was measured for non-labeled OxIAA that was synthesized with same procedure. <sup>1</sup>H-NMR (400 MHz, acetone-*d*<sub>6</sub>) δ 2.75-2.80 (2H, m), 3.72-3.74 (1H, m), 6.92 (1H, d, *J* = 7.9 Hz), 6.96 (1H, dd, *J* = 7.3, 7.6 Hz), 7.19 (1H, dd, *J* = 7.5, 7.9 Hz), 7.30 (1H, d, *J* = 7.5 Hz), 9.48 (1H, s), <sup>13</sup>C-NMR (100 MHz, acetone-*d*<sub>6</sub>) δ 34.42, 42.33, 121.90, 124.26, 128.23, 128.58, 129.81, 143.13, 172.15, 178.43.

### Synthesis of [phenyl-<sup>13</sup>C<sub>6</sub>]OxIAA-Glc

To a solution of [phenyl-<sup>13</sup>C<sub>6</sub>]OxIAA (12.0 mg, 0.061 mmol) in anhydrous CH<sub>2</sub>Cl<sub>2</sub> (5 mL) was added 2,3,4,6-tetra-*O*-(benzyl-D-glucopyranosyl)-trichloroacetimidate (104 mg, 0.15 mmol) under Ar atmosphere, and the reaction mixture was stirred at room temperature for 8 h. The resultant mixture was washed with water (1 mL) and then solvent was removed *in vacuo*. The residue was used for following reaction without further purification. Benzyl ether groups of OxIAA tetrabenzylglucoside was removed by catalytic hydrogenation with H<sub>2</sub> (2 atm) and 10% Pd/C (1 mg) in EtOAc:MeOH:AcOH = 2:2:1 (2 mL) for 4h at room temperature. After the filtration of Pd/C and evaporation of solvent, The residue was purified by a silica gel column chromatography with CHCl<sub>3</sub>–MeOH (2:1) to yield [phenyl-<sup>13</sup>C<sub>6</sub>]-3,4,5-trihydroxy-6-(hydroxymethyl)-tetrahydro-2H-pyran-2-yl-2-(2-oxoindolin-3-yl)-acetate ([phenyl-<sup>13</sup>C<sub>6</sub>]OxIAA-Glc) as an amorphous powder (6.6 mg, 31 % yield). LC-ESI-MS *m/z* 360.13: [M+H]<sup>+</sup> for C<sub>10</sub><sup>13</sup>C<sub>6</sub>H<sub>20</sub>NO<sub>8</sub>. The NMR spectrum was measured for non-labeled OxIAA-Glc that was

synthesized with same procedure.  $^1\text{H-NMR}$  (400 MHz,  $\text{CD}_3\text{OD}$ )  $\delta$  2.83-2.93 (1H, m), 3.08-3.20 (1H, m), 3.30-3.36 (4H, m), 3.65-3.83 (3H, m), 5.47 (0.5H, d,  $J = 8.0$  Hz), 5.52 (0.5H, d,  $J = 7.6$  Hz), 6.89 (1H, d,  $J = 7.6$  Hz), 6.98 (1H, dd,  $J = 7.6, 7.8$  Hz), 7.20 (1H, dd,  $J = 7.6, 7.8$  Hz), 7.30 (1H, d,  $J = 7.6$  Hz),  $^{13}\text{C-NMR}$  (100 MHz,  $\text{CD}_3\text{OD}$ )  $\delta$  35.48, 35.61, 62.35, 71.05, 73.95, 74.00, 77.88, 78.86, 78.91, 96.09, 96.16, 110.90, 123.38, 123.43, 125.31, 129.33, 130.31, 130.36, 143.67, 143.74, 171.63, 181.08, 181.14.

### **Synthesis of OxIAA, OxIAA-Glc and IAA-Glc**

OxIAA was synthesized as described in the synthesis of [phenyl- $^{13}\text{C}_6$ ]OxIAA using IAA as a starting material. OxIAA-Glc was synthesized as mentioned in the synthesis of [phenyl- $^{13}\text{C}_6$ ]OxIAA-Glc using OxIAA as a starting material. IAA-Glc was synthesized as previously published (Jakas et al. 1993; Keglevic and Pokorny 1969).

### **LC-ESI-MS/MS analysis of IAA and OxIAA**

For analysis of OxIAA and IAA in *Arabidopsis* seedlings, 30–70 mg of fresh plants were quickly weighed, frozen with liquid nitrogen and stored at  $-80^\circ\text{C}$ . Plant material was homogenized in 80 % acetone/ $\text{H}_2\text{O}$  (0.2–1 mL) containing 2–4 ng of [phenyl- $^{13}\text{C}_6$ ]OxIAA, and 2–4 ng of IAA, with ceramic beads (3 mm) using a Tissue Lyser (Qiagen) for 3 min. The supernatants were centrifuged at  $15,000 \times g$  for 3 min at  $4^\circ\text{C}$  and transferred to test tubes. The extraction was repeated two times without the internal standards. The supernatants were combined and evaporated by nitrogen gas, and centrifuged at  $15,000 \times g$  for 5 min after the volume was decreased to  $< 200 \mu\text{L}$ . The supernatant was applied to a 5- $\mu\text{m}$ ,  $4.6 \times 150$  mm Symmetry shield  $\text{C}_{18}$  column (Waters) coupled to a 5- $\mu\text{m}$ ,  $4.6 \times 10$  mm  $\text{C}_{18}$  guard column (Senshu Pak) connected to an HPLC system equipped with a 2475 multi  $\lambda$ -fluorescence detector (Waters). The samples were eluted at a flow rate of 1 mL/min with 0.01 M ammonium acetate (solvent A) and 100 % methanol (solvent B) by using 10 % solvent B for 1 min and a gradient of 10–50 % solvent B over 30 min.

For OxIAA analysis, HPLC fractions eluting at the retention time of OxIAA (7.5 - 8.5 min) were collected and evaporated by using a Speed Vac. The dried OxIAA fraction was redissolved with 1 % acetic acid/ $\text{H}_2\text{O}$  (1 mL) and applied to an Oasis HLB column (Waters). The column was washed with 20 % methanol/ $\text{H}_2\text{O}$  containing 1 % acetic acid (1 mL) before eluting the OxIAA with 70 % methanol/ $\text{H}_2\text{O}$  containing 1% acetic acid (1 mL). The eluate was then evaporated to

dryness by using a Speed Vac. The OxIAA fraction was re-dissolved in 50% acetonitrile/H<sub>2</sub>O (20 µL) and injected to UPLC. Elution of the samples was carried out with solvent A2 and acetonitrile solvent B2 using 2% solvent B2 for 0.1 min, and a gradient ranging from 2–50% of solvent B2 for 7.4 min, at a flow rate of 0.2 mL/min. The temperature of UPLC column was 40 °C. The retention time of OxIAA and [phenyl-<sup>13</sup>C<sub>6</sub>]OxIAA were 3.67 min. OxIAA was analyzed by using the negative ion mode. MS/MS analysis conditions were as follows: capillary = 2.65 kV, source temperature = 100°C, desolvation temperature = 400°C, collision energy = 8 V, sampling cone voltage = 15 V, scan time 0.6 sec/scan (delay = 0.05 sec), and MS/MS transition (*m/z*): 190.1/146.1 for unlabeled OxIAA and 196.1/152.1 for [phenyl-<sup>13</sup>C<sub>6</sub>]OxIAA. Quantification was carried out using the extracted ion chromatogram of OxIAA and [phenyl-<sup>13</sup>C<sub>6</sub>]OxIAA. A standard curve was generated using OxIAA and [phenyl-<sup>13</sup>C<sub>6</sub>]OxIAA and prepared as described above, except for the omission of the HPLC purification step.

For IAA analysis, HPLC fractions were further purified and analyzed as described by *Mashiguchi et al.* (Mashiguchi et al. 2011). IAA was quantified by using [phenyl-<sup>13</sup>C<sub>6</sub>]IAA as previously described (Sugawara et al. 2009).

## REFERENCES

- Jakas, A., Magnus, V., Horvat, S. and Sandberg, G. (1993) Synthesis of the β-D-glucosyl ester of [*carbonyl*-<sup>13</sup>C]-indole-3-acetic acid. *J Label Compd Radiopharm* 33: 933-939.
- Keglević, D. and Pokorny, M. (1969) The chemical synthesis of 1-*O*-(indol-3'-ylacetyl)-β-D-glucopyranose. The higher activity of the glucoside in comparison with exogenous indol-3-ylacetic acid in plant-section elongation tests. *Biochem J* 114: 827-832.
- Mashiguchi, K., Tanaka, K., Sakai, T., Sugawara, S., Kawaide, H., Natsume, M., et al. (2011) The main auxin biosynthesis pathway in *Arabidopsis*. *Proc Natl Acad Sci USA* 108: 18512-18517.
- Schmidt, R.R. and Michel, J. (1985) *O*-(α-D-Glucopyranosyl)trichloroacetimidate as a glucosyl donor. *J Carbohydr Chem* 4: 141-169.

Sugawara, S., Hishiyama, S., Jikumaru, Y., Hanada, A., Nishimura, T., Koshiba, T., et al. (2009) Biochemical analyses of indole-3-acetaldoxime-dependent auxin biosynthesis in *Arabidopsis*. *Proc Natl Acad Sci USA* 106: 5430-5435.

Tuominen, H., Östin, A., Sandberg, G. and Sundberg, B. (1994) A Novel Metabolic Pathway for Indole-3-Acetic Acid in Apical Shoots of *Populus tremula* (L.) x *Populus tremuloides* (Michx.). *Plant Physiol* 106: 1511-1520.
